# Supplementary material for: 3D-Printed Bioactive Scaffold Loaded with GW9508 Promotes Critical-Size Bone Defect Repair by Regulating Intracellular Metabolism
Source: MDPI journal article supplement (doi:10.3390/bioengineering10050535), 2023-04-27
Supplement: s1 [file s1]

## Article

# 3D-Printed Bioactive Scaffold Loaded with GW9508 Promotes Critical-Size Bone Defect Repair by Regulating Intracellular Metabolism

Fangli Huang <sup>1,†</sup>, Xiao Liu <sup>1,†</sup>, Xihong Fu <sup>2,†</sup>, Yan Chen <sup>1</sup>, Dong Jiang <sup>2</sup>, Tingxuan Wang <sup>1</sup>, Rongcheng Hu <sup>2</sup>, Xuenong Zou <sup>1</sup>, Hao Hu <sup>1,\*</sup> and Chun Liu <sup>1,2,\*</sup>

<sup>1</sup> Department of Spine Surgery and Guangdong Provincial Key Laboratory of Orthopaedics and Traumatology, Sun Yat-sen University First Affiliated Hospital, Guangzhou 51080, China; huangfli@mail2.sysu.edu.cn (F.H.); liux539@mail.sysu.edu.cn (X.L.); chen585@mail2.sysu.edu.cn (Y.C.); wangtx28@mail2.sysu.edu.cn (T.W.); zouxuen@mail.sysu.edu.cn (X.Z.)

<sup>2</sup> Precision Medicine Institute, Sun Yat-sen University First Affiliated Hospital, Guangzhou 51080, China; fuxh7@mail2.sysu.edu.cn (X.F.); jiangd28@mail2.sysu.edu.cn (D.J.); hurch5@mail2.sysu.edu.cn

\* Correspondence: huhao7@mail2.sysu.edu.cn (H.H.); liuch393@mail.sysu.edu.cn (C.L.)

† These authors contributed equally to this work and share first authorship.

## Supplementary Materials

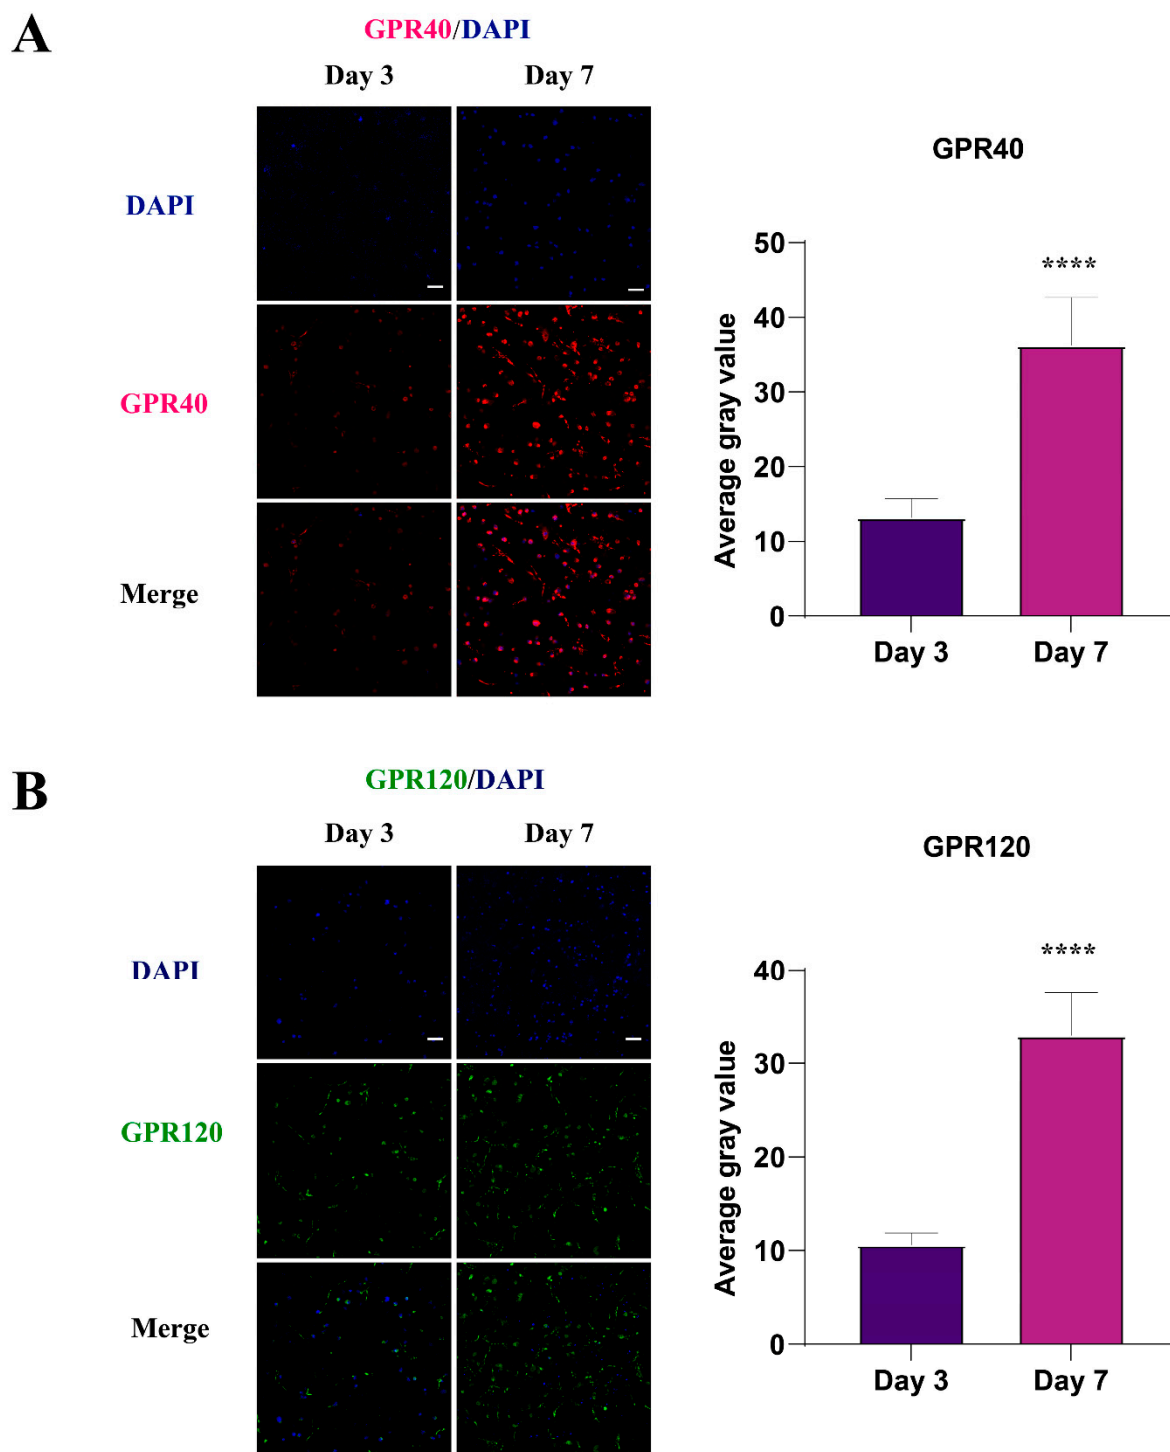

**Figure S1.** Immunofluorescence staining of (A) GPR 40 (Red) and (B) GPR 120 (Green) on rat BMSCs cultivated in COLI/HA/Alg hydrogel at Day3 and Day7. Scale bar = 50  $\mu$ m. Significance was determined using one-way analysis of variance test. n=6, “ns” represents no significant difference, \*\*\*\*P < 0.0001.

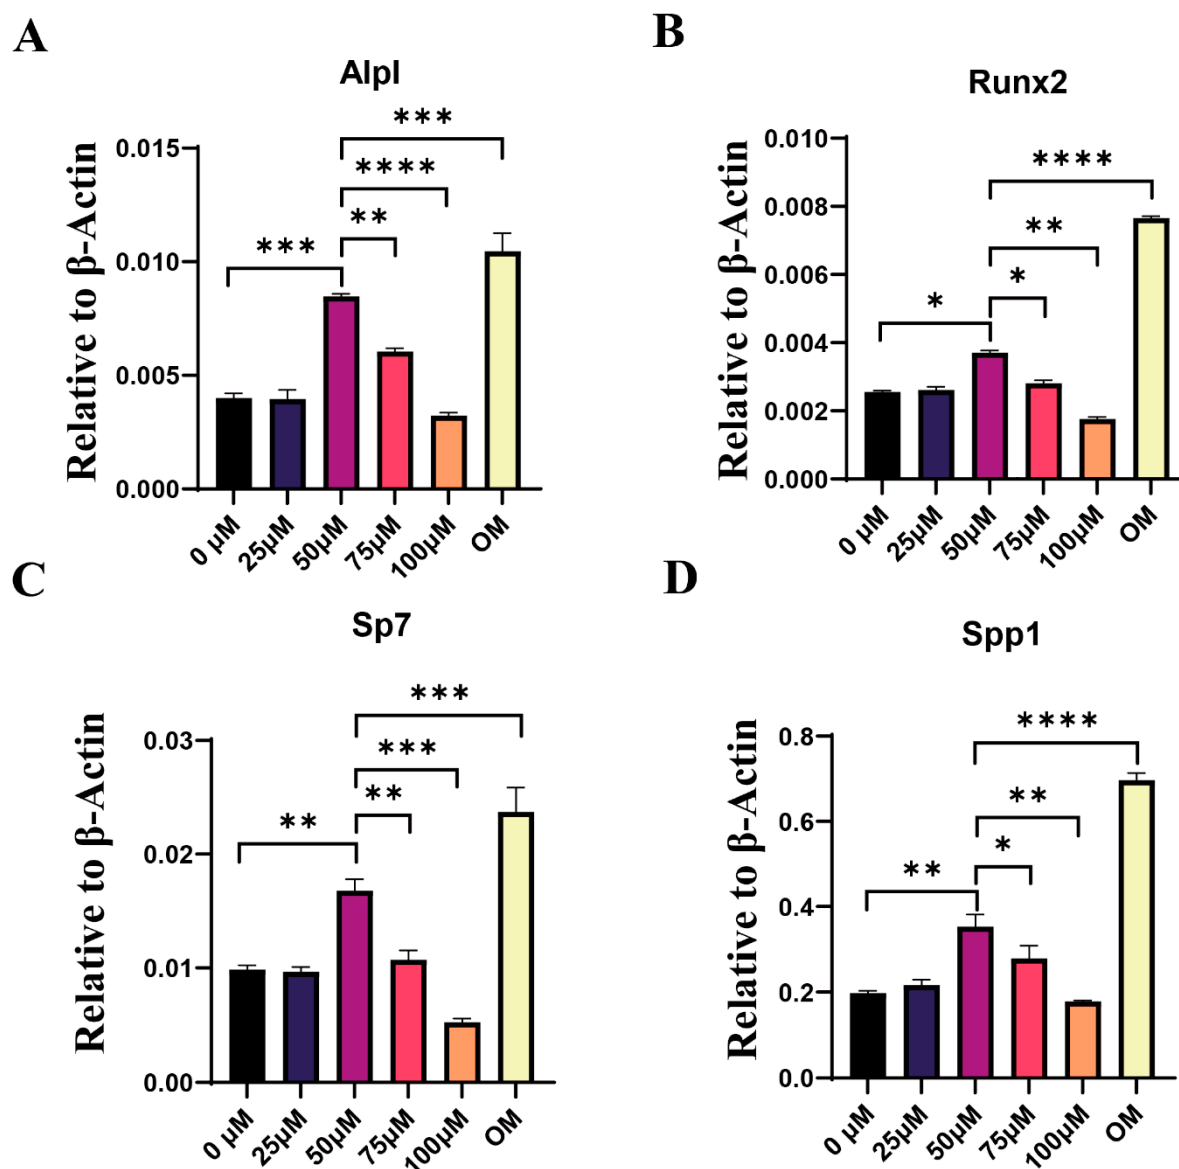

**Figure S2.** Effects of GW9508 on the osteogenic differentiation of rat Bone marrow mesenchymal stem cells (using  $\beta$ -actin as reference gene) relative to  $\beta$ -actin. A-D) Quantitative analysis of the gene expression of Alp (A), Runx2 (B), Sp7 (C), and Spp1 (D) in BMSCs at Day 14 relative to  $\beta$ -actin. Significance was determined using one-way analysis of variance test.  $n=4$ , “ns” represents no significant difference, \* $P < 0.05$ ; \*\* $P < 0.01$ ; \*\*\* $P < 0.001$ ; \*\*\*\* $P < 0.0001$ .
